# Supplementary material
Source: MDPI journal article supplement (https://www.mdpi.com/2073-4441/13/20/2831)
Supplement: s1 [file s1]

# Large-Volume Samplers for Efficient Composite Sampling and Particle Characterization in Sewer Systems

Jan Philip Nickel <sup>1,\*</sup> and Stephan Fuchs <sup>1,\*</sup>

<sup>1</sup> Karlsruhe Institute of Technology (KIT), Institute for Water and River Basin Management, Department of Aquatic Environmental Engineering, Gotthard-Franz-Str. 3, Karlsruhe 76131, Germany; stephan.fuchs@kit.edu

\* Correspondence: nickel@kit.edu (J.P.N.), stephan.fuchs@kit.edu (S.F.)

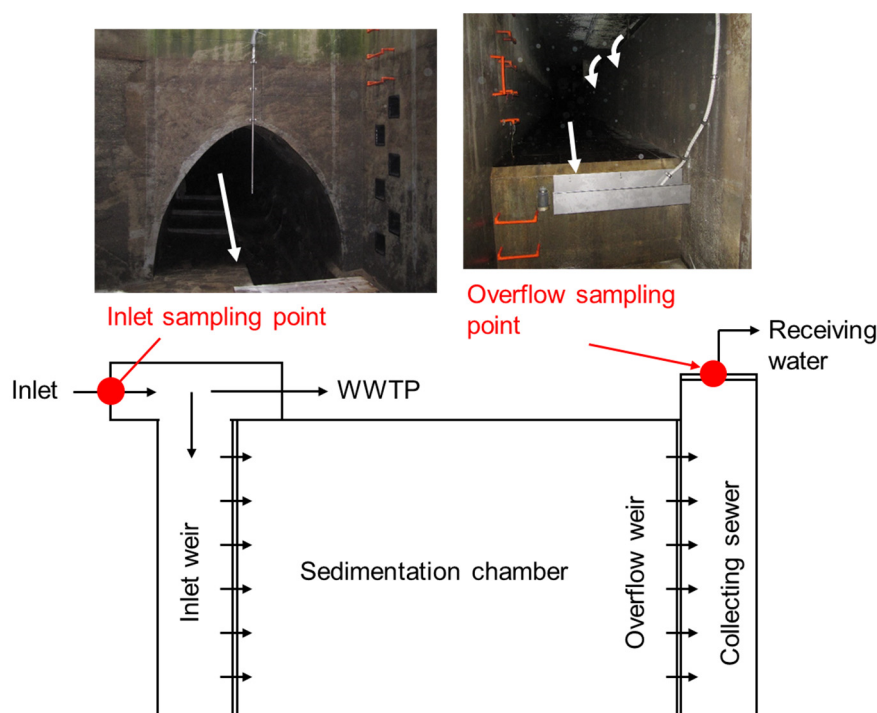

Figure S1. Sketch of CSO facility SED06 with sampling points.

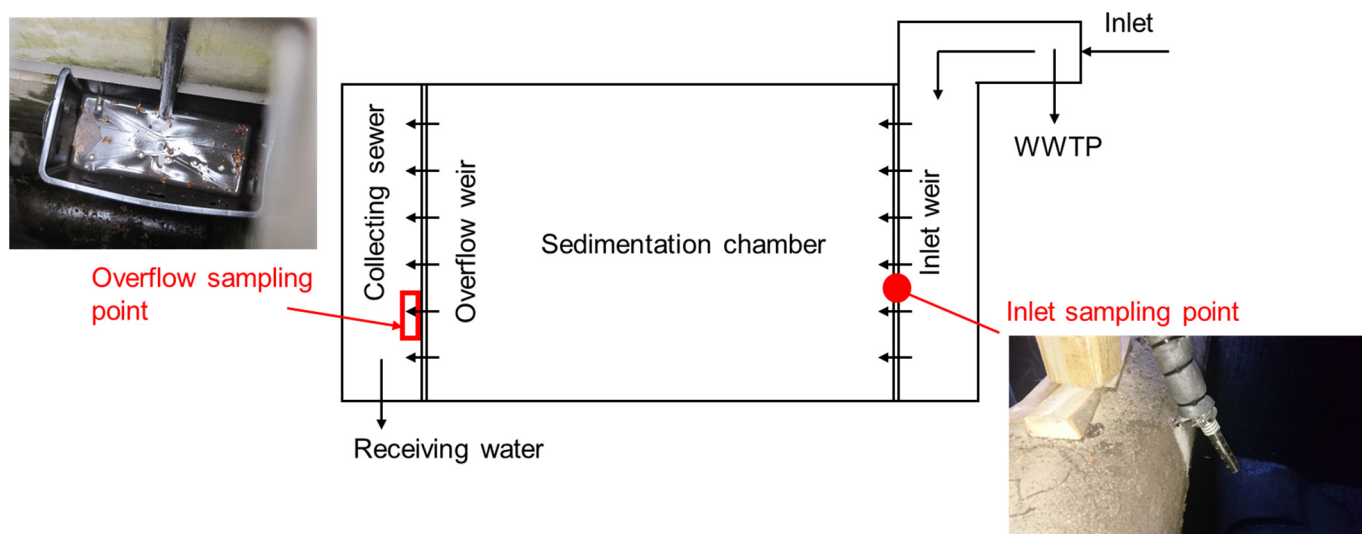

Figure S2. Sketch of CSO facility SED02 with sampling points.

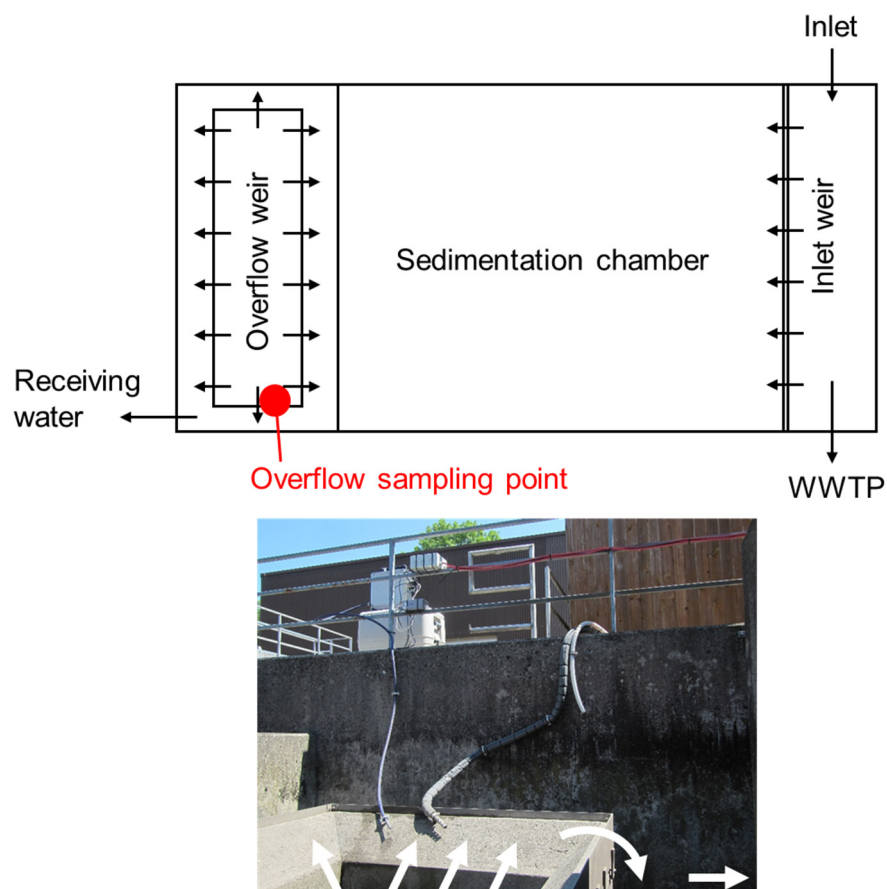

**Figure S3.** Sketch of CSO facility SED05 with sampling point.

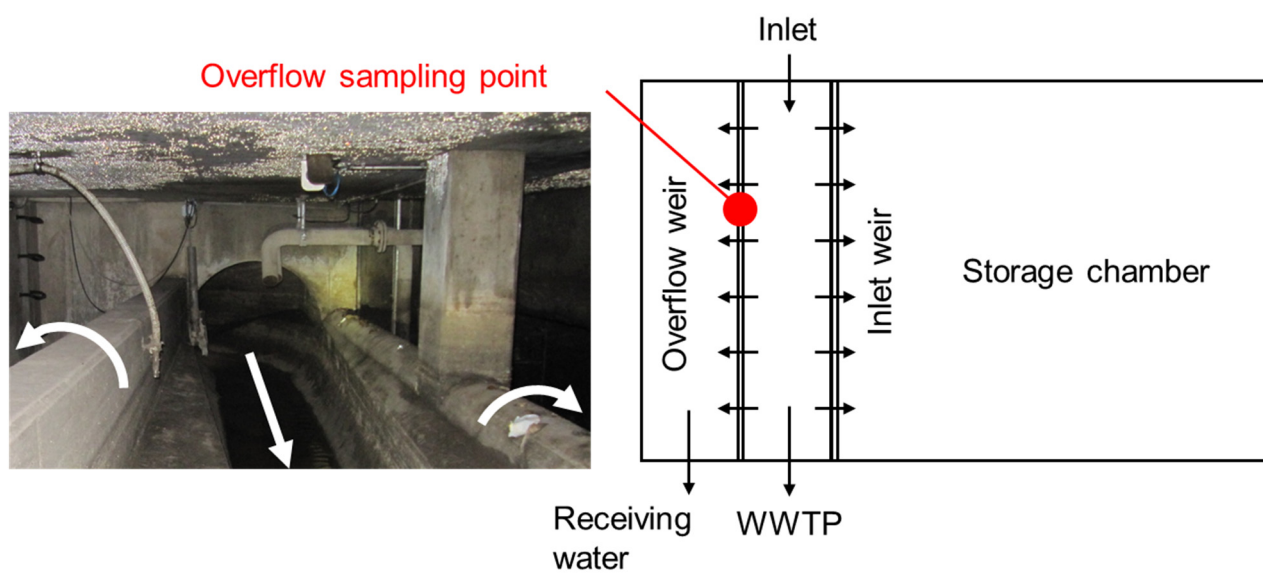

**Figure S4.** Sketch of CSO facility FFR02 with sampling point.

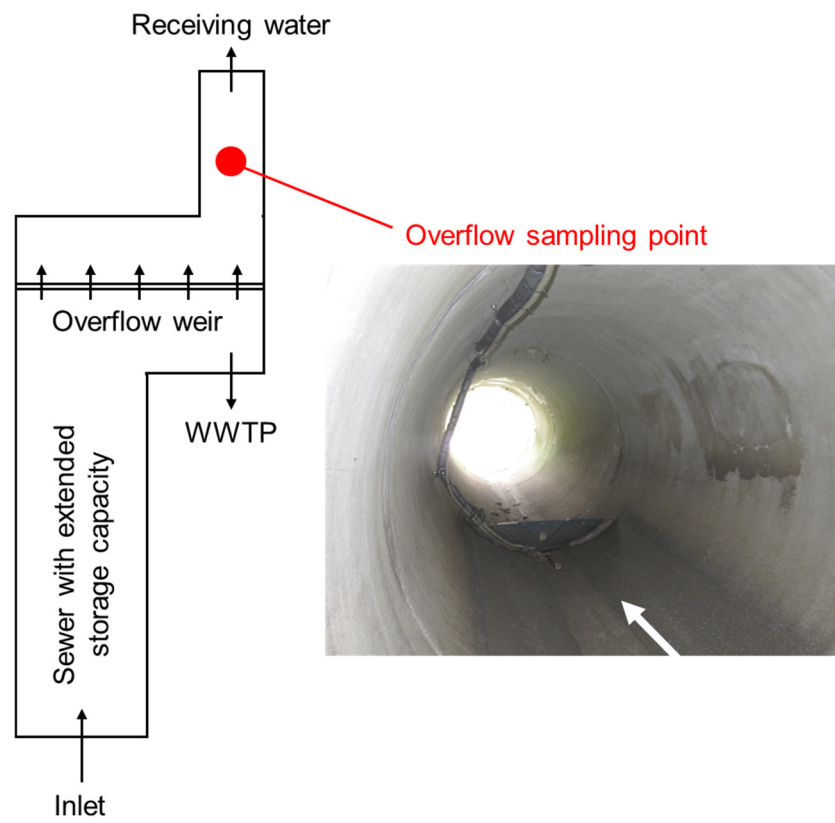

**Figure S5.** Sketch of CSO facility SES02 with sampling point.

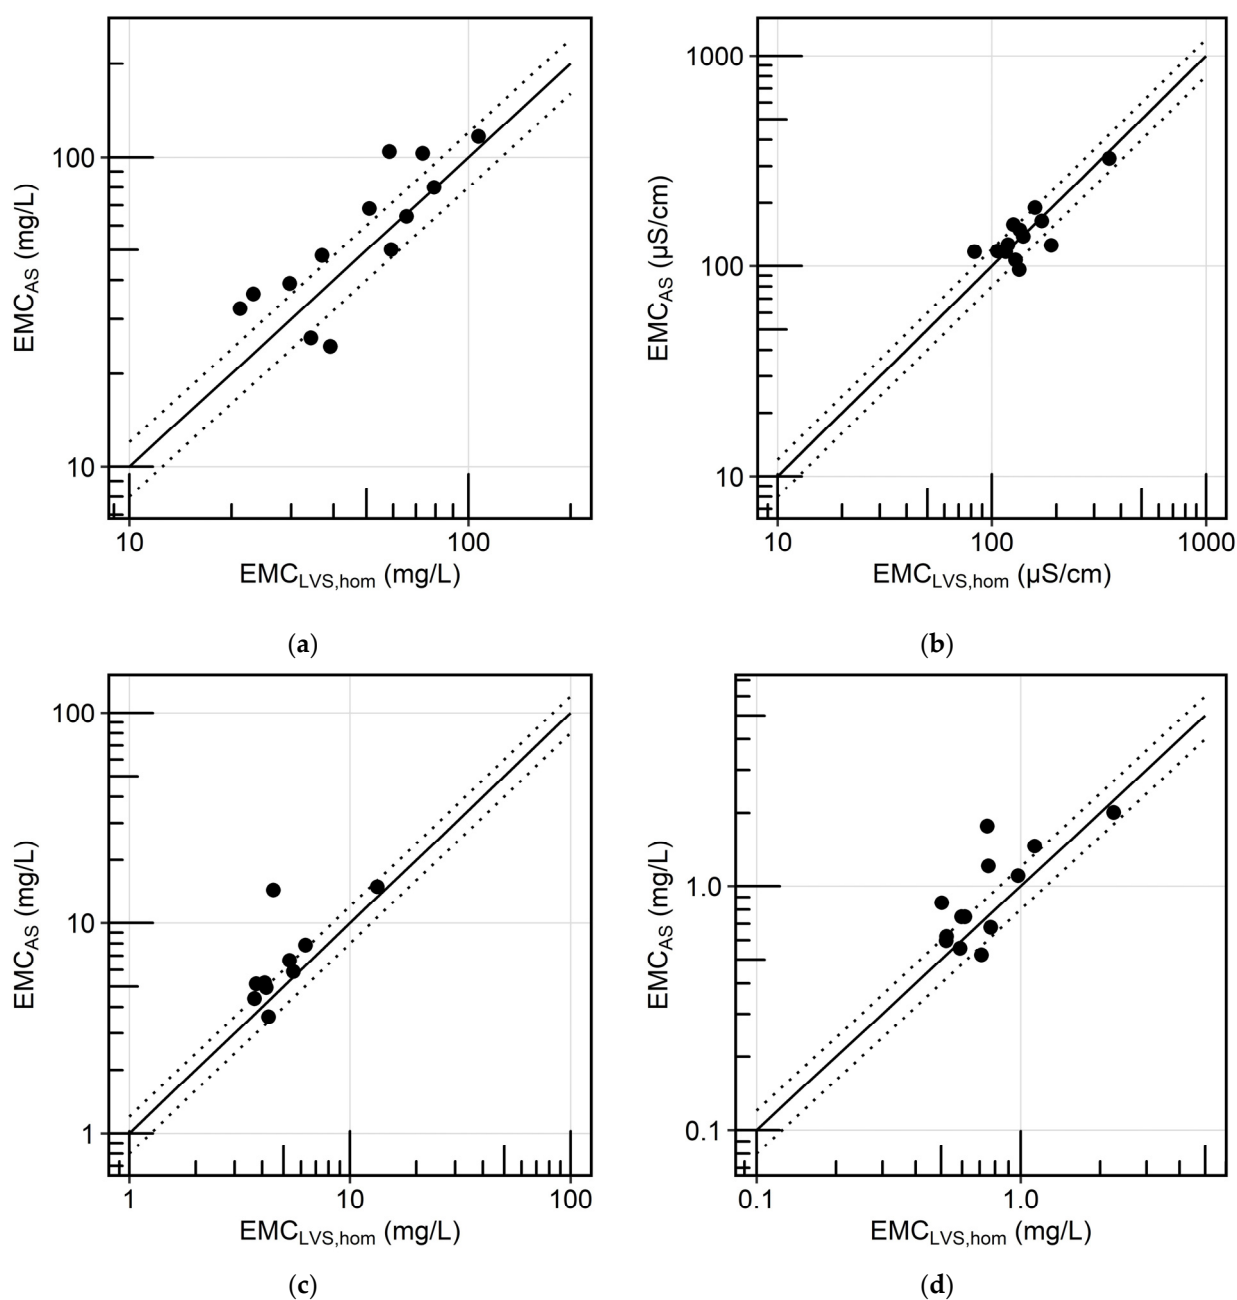

**Figure S6.** Scatterplots of EMCs derived from homogenized LVS samples ( $EMC_{LVS,hom}$ ) and autosampler pollutographs ( $EMC_{AS}$ ): (a) Chemical oxygen demand, (b) Conductivity, (c) Total nitrogen bound, (d) Total phosphorus. Dotted lines show 20% deviation.

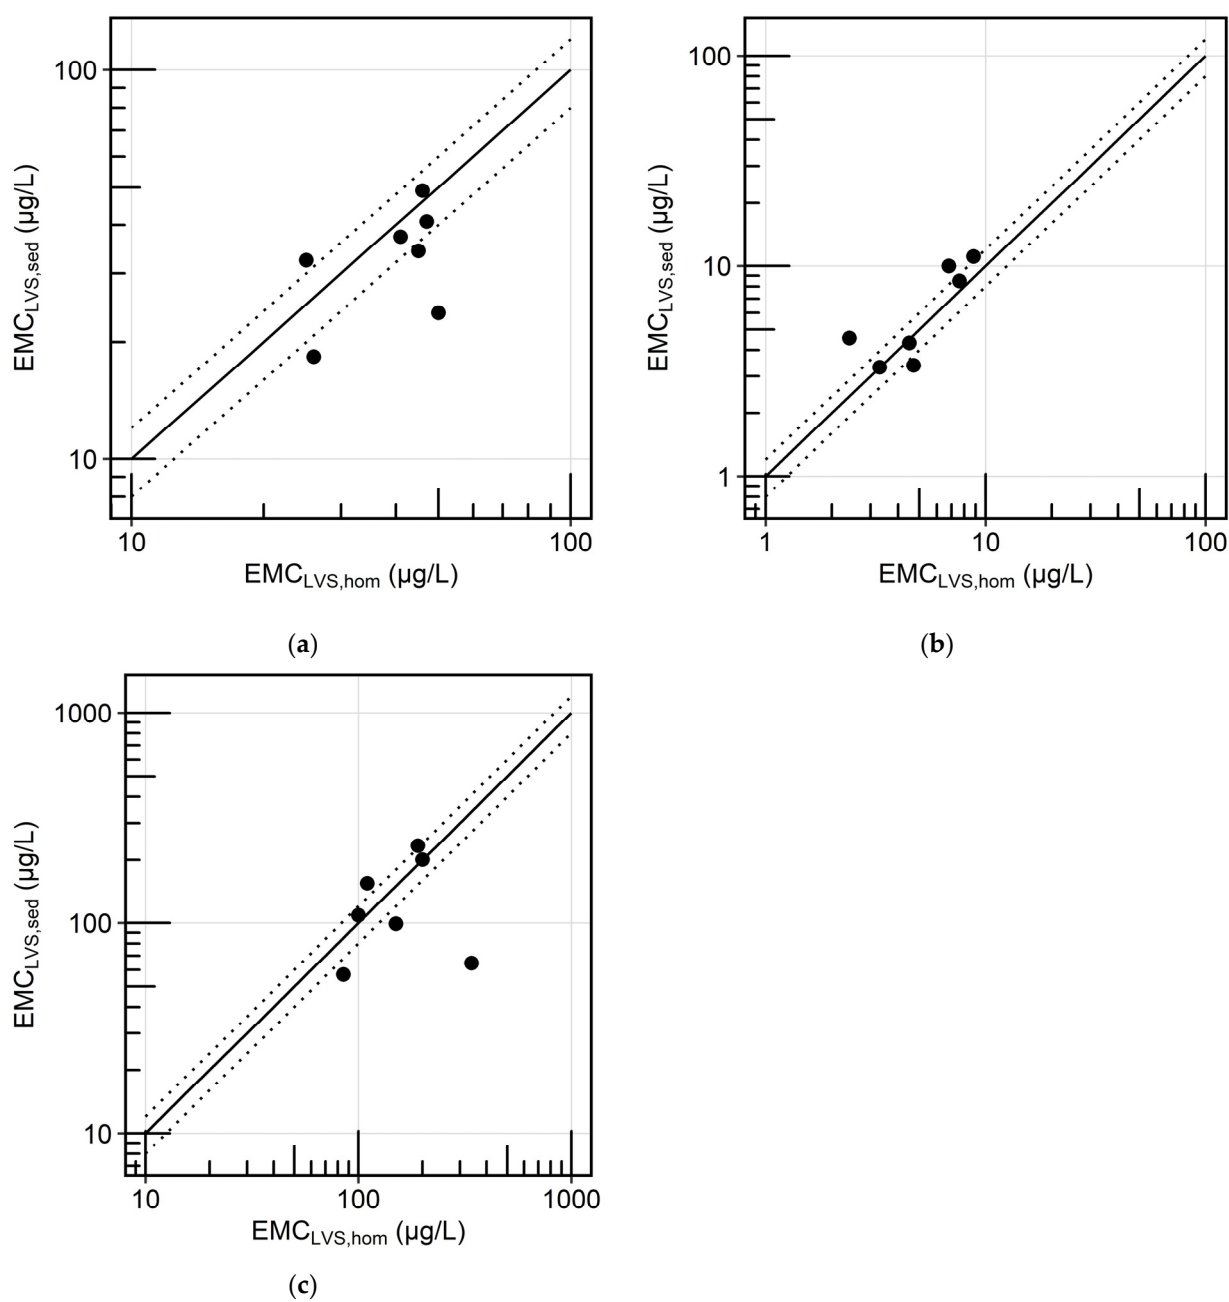

**Figure S7.** Scatterplots of EMCs derived from homogenized LVS samples ( $EMC_{LVS,hom}$ ) and sedimented LVS samples ( $EMC_{LVS,sed}$ ): (a) Copper, (b) Lead, (c) Zinc.  $EMC_{LVS,sed}$  represent particulate pollutant concentrations only,  $EMC_{LVS,hom}$  refer to the total content. Dotted lines show 20% deviation.

**Table S1.** Analytical methods used for water samples.

| Parameter(s)           | Analytical Method                                                                                                             |
|------------------------|-------------------------------------------------------------------------------------------------------------------------------|
| Conductivity           | EN 27888-C8                                                                                                                   |
| TSS                    | DIN 38409-H2                                                                                                                  |
| LOI                    | DIN 38409-H2                                                                                                                  |
| COD                    | DIN 38409-H41-H44                                                                                                             |
| TNb                    | EN ISO 11905-1                                                                                                                |
| TP, PO <sub>4</sub> -P | DIN 38405 D11-4                                                                                                               |
| Metals                 | Inductively coupled plasma with mass spectrometry (ICP-MS) (DIN EN ISO 17294) after microwave digestion with addition of acid |

**Table S2.** Analytical methods used for sediment samples.

| Parameter(s)     | Analytical Method                                                                                                             |
|------------------|-------------------------------------------------------------------------------------------------------------------------------|
| Sieving analysis | DIN 18123:2011-04                                                                                                             |
| Dry mass         | DIN 38409-H1                                                                                                                  |
| LOI              | DIN 38409-H2                                                                                                                  |
| TP               | DIN 38405 D11-4 (after perchloric acid digestion, in-house method)                                                            |
| Metals           | Inductively coupled plasma with mass spectrometry (ICP-MS) (DIN EN ISO 17294) after microwave digestion with addition of acid |

**Table S3.** Summary of analytical results of homogenized LVS samples.

| Parameter          | Unit  | Inlet |              |           | Overflow |        |           |
|--------------------|-------|-------|--------------|-----------|----------|--------|-----------|
|                    |       | n     | Median       | Min-Max   | n        | Median | Min-Max   |
| TSS                | mg/l  | 5     | 77.0         | 45.0–137  | 20       | 43.3   | 16.3–109  |
| TSS <sub>63</sub>  | mg/l  | 5     | 50.4         | 23.3–108  | 20       | 30.1   | 6.5–82.4  |
| LOI <63 µm         | %     | 5     | 41           | 33–68     | 20       | 59     | 38–77     |
| LOI 63–2,000 µm    | %     | 5     | 65           | 57–82     | 20       | 69     | 49–88     |
| pH                 | -     | 5     | 6.4          | 6.1–6.7   | 20       | 6.5    | 6.1–6.9   |
| Conductivity       | µS/cm | 5     | 134          | 83–220    | 20       | 151    | 92–353    |
| COD                | mg/l  | 5     | 98.2         | 37–116    | 20       | 54.7   | 21.2–129  |
| TNb                | mg/l  | 5     | Not analyzed |           | 20       | 5.3    | 3.69–13.3 |
| TP                 | mg/l  | 5     | 0.8          | 0.50–1.52 | 20       | 0.7    | 0.52–2.25 |
| PO <sub>4</sub> -P | mg/l  | 5     | Not analyzed |           | 20       | 0.3    | 0.22–1.33 |

**Table S4.** Summary of analytical results of sedimented LVS samples.

| Parameter                        | Unit  | Inlet |        |             | Overflow |        |            |
|----------------------------------|-------|-------|--------|-------------|----------|--------|------------|
|                                  |       | n     | Median | Min-Max     | n        | Median | Min-Max    |
| TSS                              | mg/l  | 5     | 73.0   | 46.4–120    | 11       | 62.8   | 33.5–126   |
| TSS63                            | mg/l  | 5     | 65.3   | 37.3–84.1   | 11       | 44.9   | 25.5–110   |
| LOI <63 µm                       | %     | 5     | 36     | 22–49       | 11       | 41     | 27–55      |
| LOI 63–2,000 µm                  | %     | 5     | 83     | 76–86       | 11       | 75     | 24–92      |
| <b>Supernatant</b>               |       |       |        |             |          |        |            |
| pH                               | -     | 5     | 6.6    | 6.6–6.7     | 11       | 6.7    | 6.4–7.1    |
| Conductivity                     | µS/cm | 5     | 149    | 94–204      | 11       | 148    | 91–281     |
| <b>Particle-bound pollutants</b> |       |       |        |             |          |        |            |
| TP <63 µm                        | µg/mg | 5     | 5.29   | 3.03–8.78   | 11       | 6.96   | 3.95–8.32  |
| TP 63–2,000 µm                   | µg/mg | 5     | 2.09   | 1.63–2.62   | 11       | 2.47   | 1.52–7.05  |
| Cu <63 µm                        | µg/mg | 5     | 0.34   | 0.24–0.42   | 11       | 0.48   | 0.26–0.85  |
| Cu 63–2,000 µm                   | µg/mg | 5     | 0.18   | 0.02–0.22   | 7        | 0.32   | 0.20–1.0   |
| Pb <63 µm                        | µg/mg | 5     | 0.078  | 0.070–0.097 | 11       | 0.09   | 0.058–0.12 |
| Pb 63–2,000 µm                   | µg/mg | 5     | 0.063  | 0.030–0.069 | 7        | 0.073  | 0.031–0.20 |
| Zn <63 µm                        | µg/mg | 5     | 1.10   | 0.82–1.70   | 11       | 1.90   | 0.032–2.5  |
| Zn 63–2,000 µm                   | µg/mg | 5     | 0.73   | 0.60–0.95   | 7        | 1.60   | 0.57–2.9   |

**Table S5.** Summary of analytical results of individual autosampler samples.

| Parameter    | Unit  | Inlet |        |           | Overflow |        |           |
|--------------|-------|-------|--------|-----------|----------|--------|-----------|
|              |       | n     | Median | Min-Max   | n        | Median | Min-Max   |
| TSS          | mg/l  | 24    | 38.8   | 18–112    | 215      | 36.9   | 7.86–257  |
| pH           | -     | 24    | 6.4    | 6.3–6.6   | 215      | 6.5    | 6.2–7.1   |
| Conductivity | µS/cm | 24    | 97     | 73–147    | 215      | 143    | 2.4–436   |
| COD          | mg/l  | 24    | 38.2   | 30.3–119  | 215      | 47.1   | 11.5–257  |
| TP           | mg/l  | 24    | 0.6    | 0.44–1.58 | 215      | 0.8    | 0.27–9.49 |
| TNb          | mg/l  | 24    | 4      | 3.31–8.13 | 192      | 5.5    | 2.72–21.7 |

**Table S6.** Summary of analytical results of autosampler EMCs.

| Parameter    | Unit  | Inlet |        |           | Overflow |        |           |
|--------------|-------|-------|--------|-----------|----------|--------|-----------|
|              |       | n     | Median | Min-Max   | n        | Median | Min-Max   |
| TSS          | mg/l  | 2     | 53.5   | 43.9–63.1 | 11       | 39.6   | 24.8–122  |
| Conductivity | µS/cm | 2     | 107    | 96.3–117  | 11       | 138    | 107–326   |
| COD          | mg/l  | 2     | 56.2   | 48.0–64.4 | 11       | 50.2   | 24.5–117  |
| TP           | mg/l  | 2     | 0.80   | 0.75–0.85 | 11       | 0.70   | 0.52–2.01 |
| TNb          | mg/l  | 2     | 5.1    | 4.5–5.7   | 10       | 5.5    | 3.6–14.9  |
